# Supplementary material
Source: PubMed Central journal article supplement (PMC4238311)
Supplement: Supp_Fig1.pdf [file Supp_Fig1.pdf]

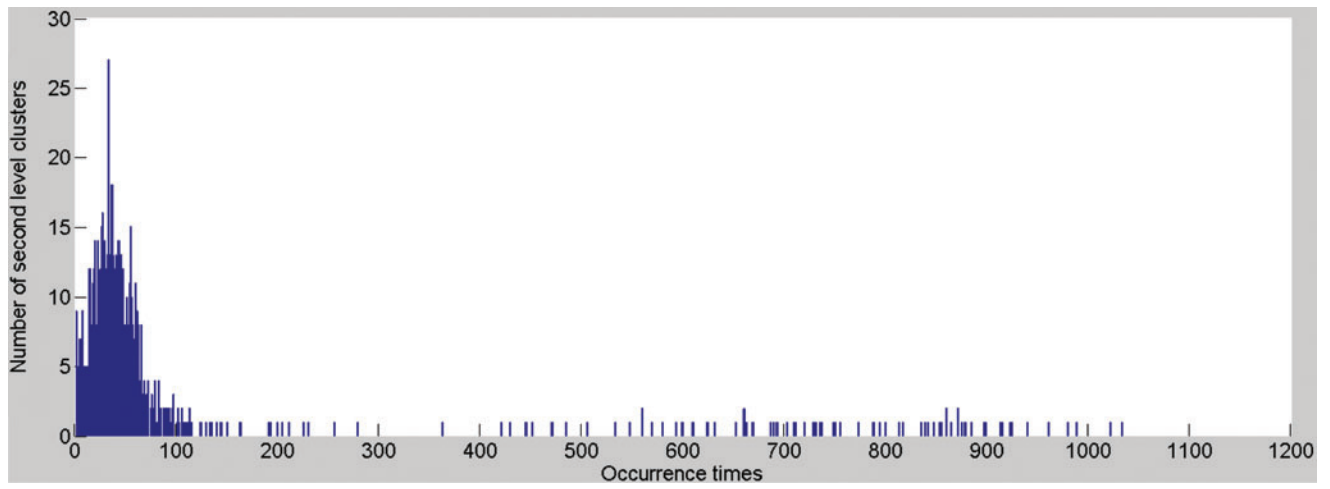

**SUPPLEMENTARY FIG. S1.** Histogram of occurrence times (in TRs) of second-level clusters from all runs. TR, repetition time.
