# Supplementary material
Source: PubMed Central journal article supplement (PMC4238311)
Supplement: Supp_Fig2.pdf [file Supp_Fig2.pdf]

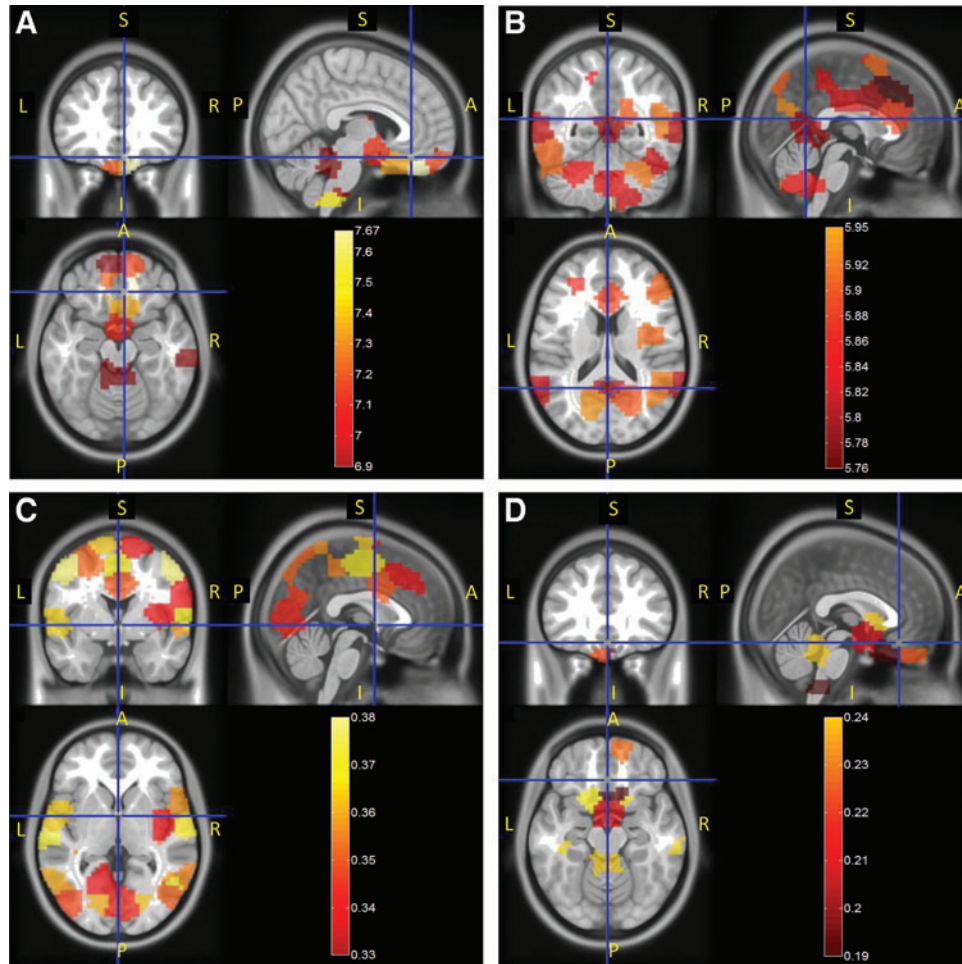

**SUPPLEMENTARY FIG. S2.** Regions with top and bottom 20% rMTST and rCFP. Regions within top 20% of all rMTSTs are shown in (A) and within bottom 20% of all rMTSTs are shown in (B). Corresponding maps for top and bottom 20% rCFPs are shown in (C, D), respectively. Hot colormap is used to represent the numeric value of corresponding metric for each region shown (A, anterior; P, posterior; S, superior; I, inferior; L, left; R, right). Compared with Figure 8 in main text, there are fewer regions highlighted in this figure. It is noteworthy that some important resting-state networks are even missing, like visual network in Figure 8A, and so do some important regions like anterior cingulate cortex (ACC) in Figure 8A and posterior cingulate cortex (PCC) in Figure 8C. This implies that with proportions of only top and bottom 20%, Supplementary Figure S1 is not as informative as Figure 8, missing some important regional information. On the other hand, if more than 30% of rMTSTs and rCFPs are shown, the amount of regions will be too numerous for any meaningful visualization. rCFP, regional clustering frequency percentage; rMTST, regional mean time before state transition.
