# Supplementary material
Source: PubMed Central journal article supplement (PMC4238311)
Supplement: Supp_Table1.pdf [file Supp_Table1.pdf]

SUPPLEMENTARY TABLE S1. MONTREAL NEUROLOGICAL INSTITUTE COORDINATES OF THE CENTROIDS OF 190 REGIONS OF CC200 ATLAS WITH CORRESPONDING AAL ANATOMICAL LABELS

| <i>Region No.</i> | <i>AAL label of region centroid</i> | <i>Coordinate x (mm)</i> | <i>Coordinate y (mm)</i> | <i>Coordinate z (mm)</i> |
|-------------------|-------------------------------------|--------------------------|--------------------------|--------------------------|
| 1                 | Pons                                | -3                       | -25                      | -38                      |
| 2                 | Frontal_Sup_Orb_R                   | 12                       | 59                       | -22                      |
| 3                 | Frontal_Inf_Tri_R                   | 49                       | 35                       | 14                       |
| 4                 | Lingual_R                           | 22                       | -58                      | 0                        |
| 5                 | Insula_R                            | 38                       | -6                       | 9                        |
| 6                 | Putamen_L                           | -25                      | -5                       | -8                       |
| 7                 | Cerebelum_6_L                       | -29                      | -38                      | -35                      |
| 8                 | Temporal_Mid_R                      | 71                       | -30                      | -2                       |
| 9                 | Precuneus_R                         | 18                       | -65                      | 25                       |
| 10                | Frontal_Sup_Medial_L                | -1                       | 25                       | 41                       |
| 11                | ParahippocampaGyrus                 | -21                      | -26                      | -14                      |
| 12                | Temporal_Pole_Mid_L                 | -31                      | 19                       | -40                      |
| 13                | Frontal_Sup_L                       | -13                      | 46                       | 42                       |
| 14                | Frontal_Inf_Orb_L                   | -20                      | 9                        | -25                      |
| 15                | Temporal_Inf_R                      | 63                       | -28                      | -26                      |
| 16                | Cerebelum_Crus1_L                   | -48                      | -67                      | -32                      |
| 17                | Postcentral_R                       | 15                       | -43                      | 75                       |
| 18                | Precuneus_L                         | -13                      | -64                      | 64                       |
| 19                | Temporal_Mid_R                      | 63                       | -7                       | -18                      |
| 20                | Frontal_Mid_R                       | 35                       | 14                       | 57                       |
| 21                | Paracentral_Lobule_R                | 15                       | -35                      | 48                       |
| 22                | Fusiform_L                          | -23                      | 3                        | -47                      |
| 23                | Frontal_Inf_Tri_L                   | -45                      | 37                       | 11                       |
| 24                | Cuneus_L                            | -9                       | -90                      | 33                       |
| 25                | Lingual_R                           | 19                       | -99                      | -10                      |
| 26                | Cerebelum_Crus1_R                   | 50                       | -68                      | -34                      |
| 27                | Caudate_R                           | 15                       | 14                       | 2                        |
| 28                | Temporal_Sup_L                      | -62                      | -26                      | 13                       |
| 29                | Caudate_L                           | -14                      | -8                       | 19                       |
| 30                | Supp_Motor_Area_R                   | 15                       | 8                        | 67                       |
| 31                | Temporal_Mid_L                      | -58                      | -5                       | -20                      |
| 32                | Calcarine_R                         | 3                        | -80                      | 7                        |
| 33                | Frontal_Mid_Orb_L                   | -31                      | 57                       | -13                      |
| 34                | Frontal_Inf_Orb_R                   | 50                       | 36                       | -12                      |
| 35                | Brainstem                           | 2                        | -43                      | -61                      |
| 36                | Rectus_R                            | 12                       | 37                       | -29                      |
| 37                | SupraMarginal_R                     | 63                       | -45                      | 33                       |
| 38                | Precuneus_L                         | -10                      | -78                      | 50                       |
| 39                | Precentral_R                        | 38                       | -18                      | 66                       |
| 40                | Pallidum_R                          | 24                       | -7                       | -5                       |
| 41                | Thalamus_R                          | 20                       | -31                      | 9                        |
| 42                | Postcentral_R                       | 35                       | -45                      | 67                       |
| 43                | Frontal_Inf_Orb_L                   | -46                      | 37                       | -13                      |
| 44                | Temporal_Pole_Mid_R                 | 34                       | 20                       | -42                      |
| 45                | Cerebelum_8_R                       | 39                       | -65                      | -56                      |
| 46                | SupraMarginal_L                     | -59                      | -29                      | 39                       |
| 47                | Cingulum_Ant_L                      | -10                      | 45                       | 10                       |
| 48                | Parietal_Inf_R                      | 34                       | -51                      | 42                       |
| 49                | Caudate_Head_L                      | -11                      | 12                       | 4                        |
| 50                | Lingual_L                           | -19                      | -76                      | -9                       |
| 51                | Supp_Motor_Area_L                   | -12                      | -10                      | 73                       |
| 52                | Cerebelum_Crus2_L                   | -34                      | -78                      | -44                      |
| 53                | Precentral_R                        | 24                       | -4                       | 50                       |
| 54                | Insula_R                            | 36                       | 20                       | 1                        |
| 55                | Postcentral_R                       | 40                       | -22                      | 43                       |
| 56                | Cerebelum_8_L                       | -31                      | -63                      | -59                      |
| 57                | Temporal_Inf_R                      | 63                       | -47                      | -18                      |
| 58                | Cuneus_L                            | -13                      | -69                      | 25                       |
| 59                | Occipital_Mid_R                     | 39                       | -82                      | 30                       |
| 60                | Temporal_Inf_L                      | -55                      | -15                      | -37                      |

(continued)

SUPPLEMENTARY TABLE S1. (CONTINUED)

| <i>Region No.</i> | <i>AAL label of region centroid</i> | <i>Coordinate x (mm)</i> | <i>Coordinate y (mm)</i> | <i>Coordinate z (mm)</i> |
|-------------------|-------------------------------------|--------------------------|--------------------------|--------------------------|
| 61                | Insula_L                            | -35                      | -7                       | 11                       |
| 62                | Thalamus_R                          | 3                        | -14                      | 7                        |
| 63                | Cerebelum_6_R                       | 27                       | -62                      | -31                      |
| 64                | Temporal_Mid_R                      | 51                       | -32                      | -3                       |
| 65                | Cingulum_Mid_L                      | -12                      | -37                      | 50                       |
| 66                | Temporal_Inf_R                      | 56                       | -13                      | -38                      |
| 67                | Frontal_Mid_L                       | -45                      | 23                       | 36                       |
| 68                | Frontal_Mid_R                       | 47                       | 27                       | 37                       |
| 69                | Frontal_Mid_L                       | -28                      | 21                       | 48                       |
| 70                | Cuneus_R                            | 16                       | -100                     | 12                       |
| 71                | Temporal_Inf_L                      | -39                      | -23                      | -27                      |
| 72                | Frontal_Sup_R                       | 15                       | 47                       | 43                       |
| 73                | Cerebelum_Crus2_L                   | -13                      | -80                      | -49                      |
| 74                | Cingulum_Post_L                     | 0                        | -43                      | 27                       |
| 75                | Fusiform_L                          | -34                      | -11                      | -43                      |
| 76                | Postcentral_L                       | -38                      | -24                      | 42                       |
| 77                | Occipital_Mid_R                     | 35                       | -89                      | 8                        |
| 78                | Frontal_Sup_Orb_L                   | -8                       | 40                       | -29                      |
| 79                | Frontal_Mid_L                       | -31                      | 39                       | 28                       |
| 80                | Precentral_L                        | -47                      | 0                        | 49                       |
| 81                | Fusiform_R                          | 24                       | 3                        | -47                      |
| 82                | Cingulum_Mid_R                      | 2                        | 6                        | 35                       |
| 83                | Frontal_Sup_Medial_R                | 10                       | 60                       | 25                       |
| 84                | Temporal_Inf_R                      | 42                       | -3                       | -47                      |
| 85                | Lingual_L                           | -16                      | -59                      | 1                        |
| 86                | Occipital_Mid_L                     | -28                      | -96                      | -2                       |
| 87                | Precentral_R                        | 50                       | 0                        | 50                       |
| 88                | Calcarine_L                         | -8                       | -99                      | -11                      |
| 89                | Frontal_Mid_L                       | -26                      | -3                       | 54                       |
| 90                | Frontal_Mid_Orb_R                   | 33                       | 57                       | -14                      |
| 91                | Frontal_Sup_L                       | -16                      | 58                       | 26                       |
| 92                | Angular_R                           | 55                       | -66                      | 32                       |
| 93                | Precentral_R                        | 16                       | -17                      | 73                       |
| 94                | Cerebelum_Crus2_L                   | -46                      | -51                      | -47                      |
| 95                | Parietal_Sup_L                      | -32                      | -50                      | 65                       |
| 96                | Cerebelum_Crus2_R                   | 33                       | -84                      | -37                      |
| 97                | Cerebelum_8_R                       | 17                       | -76                      | -52                      |
| 98                | Temporal_Mid_R                      | 65                       | -53                      | 7                        |
| 99                | Cingulum_Mid_L                      | 0                        | -18                      | 33                       |
| 100               | Cerebelum_8_L                       | -21                      | -44                      | -52                      |
| 101               | Temporal_Mid_L                      | -61                      | -55                      | 10                       |
| 102               | Temporal_Pole_Mid_R                 | 51                       | 11                       | -32                      |
| 103               | Temporal_Inf_L                      | -46                      | 5                        | -39                      |
| 104               | Frontal_Sup_R                       | 14                       | 30                       | 57                       |
| 105               | Thalamus_L                          | -16                      | -31                      | 9                        |
| 106               | Postcentral_L                       | -57                      | -7                       | 28                       |
| 107               | Frontal_Mid_R                       | 42                       | 50                       | 4                        |
| 108               | Frontal_Mid_L                       | -33                      | 54                       | 7                        |
| 109               | Temporal_Sup_R                      | 63                       | -8                       | 6                        |
| 110               | ParaHippocampal_R                   | 19                       | -12                      | -26                      |
| 111               | Lingual_R                           | 21                       | -74                      | -11                      |
| 112               | Cingulum_Ant_R                      | 2                        | 27                       | 21                       |
| 113               | Vermis_9                            | 1                        | -55                      | -41                      |
| 114               | Temporal_Mid_L                      | -64                      | -24                      | -16                      |
| 115               | Postcentral_R                       | 58                       | -25                      | 49                       |
| 116               | Insula_L                            | -33                      | 20                       | 2                        |
| 117               | Caudate_R                           | 16                       | -7                       | 20                       |
| 118               | Angular_L                           | -48                      | -74                      | 29                       |
| 119               | Frontal_Mid_Orb_L                   | -25                      | 34                       | -17                      |
| 120               | Postcentral_R                       | 60                       | -2                       | 29                       |
| 121               | Olfactory                           | 0                        | 0                        | -13                      |

(continued)

SUPPLEMENTARY TABLE S1. (CONTINUED)

| <i>Region No.</i> | <i>AAL label of region centroid</i> | <i>Coordinate x (mm)</i> | <i>Coordinate y (mm)</i> | <i>Coordinate z (mm)</i> |
|-------------------|-------------------------------------|--------------------------|--------------------------|--------------------------|
| 122               | Occipital_Mid_L                     | -30                      | -87                      | 23                       |
| 123               | Fusiform_R                          | 37                       | -18                      | -33                      |
| 124               | Frontal_Sup_Medial_L                | -11                      | 66                       | 5                        |
| 125               | Temporal_Mid_R                      | 50                       | -75                      | 8                        |
| 126               | Vermis_4_5                          | 2                        | -49                      | 6                        |
| 127               | SupraMarginal_R                     | 65                       | -25                      | 25                       |
| 128               | Precentral_L                        | -29                      | -25                      | 67                       |
| 129               | Insula_R                            | 42                       | -7                       | -14                      |
| 130               | Frontal_Sup_Medial_L                | -10                      | 31                       | 56                       |
| 131               | Parietal_Sup_R                      | 18                       | -63                      | 65                       |
| 132               | Temporal_Inf_L                      | -53                      | -61                      | -11                      |
| 133               | Occipital_Inf_R                     | 41                       | -86                      | -14                      |
| 134               | Frontal_Sup_Medial_R                | 10                       | 67                       | -1                       |
| 135               | Temporal_Sup_L                      | -42                      | -17                      | -7                       |
| 136               | Vermis_6                            | 0                        | -64                      | -20                      |
| 137               | Occipital_Sup_R                     | 15                       | -89                      | 33                       |
| 138               | Frontal_Med_Orb_R                   | 0                        | 35                       | -10                      |
| 139               | Supp_Motor_Area_L                   | -11                      | 11                       | 65                       |
| 140               | Parietal_Inf_R                      | 53                       | -47                      | 54                       |
| 141               | Frontal_Mid_R                       | 33                       | 47                       | 26                       |
| 142               | Cerebelum_8_R                       | 32                       | -41                      | -46                      |
| 143               | Fusiform_L                          | -28                      | -44                      | -12                      |
| 144               | Cerebelum_9_L                       | -7                       | -61                      | -57                      |
| 145               | Precuneus_L                         | 0                        | -57                      | 45                       |
| 146               | Temporal_Pole_Sup_R                 | 55                       | 11                       | -6                       |
| 147               | SupraMarginal_L                     | -58                      | -50                      | 32                       |
| 148               | Rolandic_Oper_L                     | -56                      | 1                        | 2                        |
| 149               | Cerebelum_Crus2_L                   | -14                      | -87                      | -30                      |
| 150               | Vermis_1_2                          | -2                       | -43                      | -23                      |
| 151               | Supp_Motor_Area_L                   | -2                       | -11                      | 54                       |
| 152               | Angular_R                           | 40                       | -69                      | 51                       |
| 153               | Temporal_Mid_R                      | 46                       | -53                      | 17                       |
| 154               | Fusiform_R                          | 44                       | -43                      | -24                      |
| 155               | Cerebelum_8_R                       | 19                       | -55                      | -58                      |
| 156               | Precuneus_L                         | -12                      | -46                      | 73                       |
| 157               | Parietal_Inf_L                      | -49                      | -54                      | 51                       |
| 158               | ParaHippocampal_L                   | -18                      | -14                      | -28                      |
| 159               | Temporal_Pole_Sup_L                 | -42                      | 13                       | -20                      |
| 160               | Cerebelum_3_R                       | 15                       | -32                      | -39                      |
| 161               | Frontal_Mid_R                       | 25                       | 28                       | 38                       |
| 162               | Occipital_Mid_L                     | -46                      | -80                      | 4                        |
| 163               | Postcentral_L                       | -48                      | -26                      | 58                       |
| 164               | Frontal_Inf_Oper_R                  | 40                       | 9                        | 29                       |
| 165               | Midbrain                            | 0                        | -24                      | -12                      |
| 166               | Precentral_L                        | -37                      | 6                        | 29                       |
| 167               | Rolandic_Oper_L                     | -40                      | -33                      | 17                       |
| 168               | RectalGyrus                         | 3                        | 19                       | -26                      |
| 169               | Parietal_Inf_L                      | -32                      | -51                      | 41                       |
| 170               | Frontal_Inf_Oper_L                  | -52                      | 18                       | 13                       |
| 171               | Occipital_Sup_L                     | -10                      | -101                     | 12                       |
| 172               | Frontal_Inf_Orb_R                   | 28                       | 34                       | -17                      |
| 173               | Frontal_Sup_R                       | 27                       | 62                       | 9                        |
| 174               | Cerebelum_6_L                       | -26                      | -62                      | -30                      |
| 175               | Fusiform_R                          | 26                       | -38                      | -13                      |
| 176               | Rolandic_Oper_R                     | 43                       | -27                      | 17                       |
| 177               | Paracentral_Lobule_L                | -4                       | -29                      | 72                       |
| 178               | Temporal_Inf_R                      | 51                       | -64                      | -11                      |
| 179               | Temporal_Mid_L                      | -42                      | -58                      | 15                       |
| 180               | Temporal_Inf_L                      | -52                      | -42                      | -26                      |
| 181               | Fusiform_L                          | -38                      | -83                      | -18                      |
| 182               | Cerebelum_Crus2_R                   | 51                       | -50                      | -44                      |

(continued)

SUPPLEMENTARY TABLE S1. (CONTINUED)

| <i>Region No.</i> | <i>AAL label of region centroid</i> | <i>Coordinate x (mm)</i> | <i>Coordinate y (mm)</i> | <i>Coordinate z (mm)</i> |
|-------------------|-------------------------------------|--------------------------|--------------------------|--------------------------|
| 183               | Parietal_Inf_L                      | -33                      | -75                      | 48                       |
| 184               | Parietal_Sup_R                      | 16                       | -76                      | 52                       |
| 185               | Temporal_Pole_Sup_R                 | 28                       | 10                       | -25                      |
| 186               | Cerebelum_Crus2_R                   | 11                       | -86                      | -31                      |
| 187               | Temporal_Mid_L                      | -58                      | -39                      | -5                       |
| 188               | Rectus_L                            | -9                       | 60                       | -17                      |
| 189               | Cingulum_Ant_R                      | 13                       | 44                       | 6                        |
| 190               | Frontal_Inf_Oper_R                  | 57                       | 16                       | 16                       |

AAL, automatic anatomical labeling.
