# Supplementary material
Source: PubMed Central journal article supplement (PMC4238311)
Supplement: Supp_Table2.pdf [file Supp_Table2.pdf]

SUPPLEMENTARY TABLE S2. DESCRIPTION OF CATEGORIZED BEHAVIORAL MEASURES EMPLOYED IN THIS WORK

| <i>Category: Alertness</i>                                                          |                                                                                                     |                            |
|-------------------------------------------------------------------------------------|-----------------------------------------------------------------------------------------------------|----------------------------|
| <i>Variable name</i>                                                                | <i>Description</i>                                                                                  | <i>Values</i>              |
| Instrument: Cognitive Status (Mini Mental Status Exam/MMSE)                         |                                                                                                     |                            |
| 1. MMSE Score                                                                       | Mini Mental Status Exam Total Score                                                                 |                            |
| Instrument: Sleep (Pittsburgh Sleep Questionnaire/PSQI)                             |                                                                                                     |                            |
| 2. PSQI Score                                                                       | Sleep (Pittsburgh Sleep Questionnaire) Total Score                                                  |                            |
| <i>Category: Cognition</i>                                                          |                                                                                                     |                            |
| <i>Variable name</i>                                                                | <i>Description</i>                                                                                  | <i>Values</i>              |
| Instrument: Episodic Memory (Picture Sequence Memory)                               |                                                                                                     |                            |
| 3. Picture Sequence Unadjusted                                                      | NIH Toolbox Picture Sequence Memory Test Unadjusted Scale Score                                     |                            |
| 4. Picture Sequence Adjusted                                                        | NIH Toolbox Picture Sequence Memory Test Age-Adjusted Scale Score                                   |                            |
| Instrument: Executive Function/Cognitive Flexibility (Dimensional Change Card Sort) |                                                                                                     |                            |
| 5. Card Sort Unadjusted                                                             | NIH Toolbox Dimensional Change Card Sort Test Unadjusted Scale Score                                |                            |
| 6. Card Sort Adjusted                                                               | NIH Toolbox Dimensional Change Card Sort Test Age-Adjusted Scale Score                              |                            |
| Instrument: Executive Function/Inhibition (Flanker Task)                            |                                                                                                     |                            |
| 7. Flanker Task Unadjusted                                                          | NIH Toolbox Flanker Inhibitory Control and Attention Test Unadjusted Scale Score                    |                            |
| 8. Flanker Task Adjusted                                                            | NIH Toolbox Flanker Inhibitory Control and Attention Test Adjusted Scale Score                      |                            |
| Instrument: Fluid Intelligence (Penn Progressive Matrices)                          |                                                                                                     |                            |
| 9. PMAT24_A_CR                                                                      | Penn Matrix Test: Number of Correct Responses                                                       | 0–24                       |
| 10. PMAT24_A_SI                                                                     | Penn Matrix Test: Total Skipped Items (items not presented because maximum errors allowed reached)  | 0–19                       |
| 11. PMAT24_A_RT                                                                     | Penn Matrix Test: Median Reaction Time for Correct Responses                                        | Typical range: 2730–51,730 |
| Instrument: Language/Reading Decoding (Oral Reading Recognition)                    |                                                                                                     |                            |
| 12. Reading Test Unadjusted                                                         | NIH Toolbox Oral Reading Recognition Test Unadjusted Scale Score                                    |                            |
| 13. Reading Test Adjusted                                                           | NIH Toolbox Oral Reading Recognition Test Adjusted Scale Score                                      |                            |
| Instrument: Language/Receptive vocabulary                                           |                                                                                                     |                            |
| 14. Picture Vocabulary Test Unadjusted                                              | NIH Toolbox Picture Vocabulary Test Unadjusted Scale Score                                          |                            |
| 15. Picture Vocabulary Test Adjusted                                                | NIH Toolbox Picture Vocabulary Test Adjusted Scale Score                                            |                            |
| Instrument: Processing Speed (Pattern Completion Processing Speed)                  |                                                                                                     |                            |
| 16. Processing Speed Unadjusted                                                     | NIH Toolbox Pattern Comparison Processing Speed Test Unadjusted Scale Score                         |                            |
| 17. Processing Speed Adjusted                                                       | NIH Toolbox Pattern Comparison Processing Speed Test Adjusted Scale Score                           |                            |
| Instrument: Self-regulation/Impulsivity (Delay Discounting)                         |                                                                                                     |                            |
| 18. SV_1mo_200                                                                      | Subjective Value for \$200 at 1 month                                                               | 0–200                      |
| 19. SV_6mo_200                                                                      | Subjective Value for \$200 at 6 months                                                              | 0–200                      |
| 20. SV_3yr_200                                                                      | Subjective Value for \$200 at 3 years                                                               | 0–200                      |
| 21. SV_1yr_200                                                                      | Subjective Value for \$200 at 1 year                                                                | 0–200                      |
| 22. SV_5yr_200                                                                      | Subjective Value for \$200 at 5 years                                                               | 0–200                      |
| 23. SV_10yr_200                                                                     | Subjective Value for \$200 at 10 years                                                              | 0–200                      |
| 24. SV_1mo_40K                                                                      | Subjective Value for \$40,000 at 1 month                                                            | 0–40,000                   |
| 25. SV_6mo_40K                                                                      | Subjective Value for \$40,000 at 6 months                                                           | 0–40,000                   |
| 26. SV_1yr_40K                                                                      | Subjective Value for \$40,000 at 1 year                                                             | 0–40,000                   |
| 27. SV_3yr_40K                                                                      | Subjective Value for \$40,000 at 3 years                                                            | 0–40,000                   |
| 28. SV_5yr_40K                                                                      | Subjective Value for \$40,000 at 5 years                                                            | 0–40,000                   |
| 29. SV_10yr_40K                                                                     | Subjective Value for \$40,000 at 10 years                                                           | 0–40,000                   |
| 30. AUC_200                                                                         | Area Under the Curve for Discounting of \$200                                                       | 0.0–1.0                    |
| 31. AUC_40K                                                                         | Area Under the Curve for Discounting of \$40,000                                                    | 0.0–1.0                    |
| Instrument: Spatial Orientation (Variable Short Penn Line Orientation Test)         |                                                                                                     |                            |
| 32. VSPLIT_TC                                                                       | Penn Line Orientation: Total Number Correct                                                         | 0–24                       |
| 33. VSPLIT_CRTE                                                                     | Penn Line Orientation: Median Reaction Time Divided by Expected Number of Clicks for Correct Trials | Typical range: 640–2800    |

(continued)

SUPPLEMENTARY TABLE S2. (CONTINUED)

| <i>Category: Cognition</i>                                               |                                                                       |                          |
|--------------------------------------------------------------------------|-----------------------------------------------------------------------|--------------------------|
| <i>Variable name</i>                                                     | <i>Description</i>                                                    | <i>Values</i>            |
| 34. VSLOT_OFF                                                            | Penn Line Orientation: Total Positions Off for All Trials             | 0–165                    |
| Instrument: Sustained Attention (Short Penn Continuous Performance Test) |                                                                       |                          |
| 35. SCPT_TP                                                              | Short Penn CPT True Positives = Sum of CPN_TP and CPL_TP              | 0–60                     |
| 36. SCPT_TN                                                              | Short Penn CPT True Negatives = Sum of CPN_TN and CPL_TPN             | 0–120                    |
| 37. SCPT_FP                                                              | Short Penn CPT False Positives = Sum of CPN_FP and CPL_FP             | 0–120                    |
| 38. SCPT_FN                                                              | Short Penn CPT False Negatives = Sum of CPN_FN and CPL_FN             | 0–60                     |
| 39. SCPT_TPRT                                                            | Short Penn CPT Median Response Time for True Positive Responses       | 0–1000 msec              |
| 40. SCPT_SEN                                                             | Short Penn CPT Sensitivity = SCPT_TP / (SCPT_TP + SCPT_FN)            | Typical range: 0.8–1.0   |
| 41. SCPT_SPEC                                                            | Short Penn CPT Specificity = SCPT_TN / (SCPT_TN + SCPT_FP)            | Typical range: 0.8–1.0   |
| 42. CPT_LRNR                                                             | Short Penn CPT Longest Run of Nonresponses)                           | 5–16                     |
| Instrument: Verbal Episodic Memory (Penn Word Memory Test)               |                                                                       |                          |
| 43. IWRD_TOT                                                             | Penn Word Memory: Total Number of Correct Responses                   | 0–40                     |
| 44. IWRD_RTC                                                             | Penn Word Memory: Median Reaction Time for Correct Responses          | Typical range: 1100–3200 |
| Instrument: Working Memory (List Sorting)                                |                                                                       |                          |
| 45. List Sorting Unadjusted                                              | NIH Toolbox List Sorting Working Memory Test Unadjusted Scale Score   |                          |
| 46. List Sorting Adjusted                                                | NIH Toolbox List Sorting Working Memory Test Adjusted Scale Score     |                          |
| <i>Category: Emotion</i>                                                 |                                                                       |                          |
| Instrument: Emotion Recognition (Penn Emotion Recognition Test)          |                                                                       |                          |
| 47. ER40_CR                                                              | Penn Emotion Recognition: Number of Correct Responses                 | 0–40                     |
| 48. ER40_CRT                                                             | Penn Emotion Recognition: Correct Responses Median Response Time (ms) | Typical range: 1435–2746 |
| 49. ER40ANG                                                              | Penn Emotion Recognition: Correct Anger Identifications               | 0–8                      |
| 50. ER40FEAR                                                             | Penn Emotion Recognition: Correct Fear Identifications                | 0–8                      |
| 51. ER40HAP                                                              | Penn Emotion Recognition: Correct Happy Identifications               | 0–8                      |
| 52. ER40NOE                                                              | Penn Emotion Recognition: Correct Neutral Identifications             | 0–8                      |
| 53. ER40SAD                                                              | Penn Emotion Recognition: Correct Sad Identifications                 | 0–8                      |
| Instrument: Negative Affect                                              |                                                                       |                          |
| 54. Anger-Affect                                                         | NIH Toolbox Anger-Affect Survey                                       |                          |
| 55. Anger-Hostility                                                      | NIH Toolbox Anger-Hostility Survey                                    |                          |
| 56. Anger-Aggression                                                     | NIH Toolbox Anger-Physical Aggression Survey                          |                          |
| 57. Fear-Affect                                                          | NIH Toolbox Fear-Affect Survey                                        |                          |
| 58. Fear-Somatic                                                         | NIH Toolbox Fear-Somatic Arousal Survey                               |                          |
| 59. Sadness                                                              | NIH Toolbox Sadness Survey                                            |                          |
| Instrument: Psychological Well-being                                     |                                                                       |                          |
| 60. Life Satisfaction                                                    | NIH Toolbox General Life Satisfaction Survey                          |                          |
| 61. Meaning and Purpose                                                  | NIH Toolbox Meaning and Purpose Survey                                |                          |
| 62. Positive Affect                                                      | NIH Toolbox Positive Affect Survey                                    |                          |
| Instrument: Social Relationships                                         |                                                                       |                          |
| 63. Friendship                                                           | NIH Toolbox Friendship Survey                                         |                          |
| 64. Loneliness                                                           | NIH Toolbox Loneliness Survey                                         |                          |
| 65. Perceived Hostility                                                  | NIH Toolbox Perceived Hostility Survey                                |                          |
| 66. Perceived Rejection                                                  | NIH Toolbox Perceived Rejection Survey                                |                          |

(continued)

SUPPLEMENTARY TABLE S2. (CONTINUED)

| <i>Category: Cognition</i>              |                                         |                      |
|-----------------------------------------|-----------------------------------------|----------------------|
| <i>Variable name</i>                    | <i>Description</i>                      | <i>Values</i>        |
| 67. Emotional Support                   | NIH Toolbox Emotional Support Survey    |                      |
| 68. Instrumental Support                | NIH Toolbox Instrumental Support Survey |                      |
| Instrument: Stress and Self Efficacy    |                                         |                      |
| 69. Perceived Stress                    | NIH Toolbox Perceived Stress Survey     |                      |
| 70. Self-Efficacy                       | NIH Toolbox Self-Efficacy Survey        |                      |
| <i>Category: Personality</i>            |                                         |                      |
| <i>Variable name</i>                    | <i>Description</i>                      | <i>Values</i>        |
| Instrument: Five-Factor Model (NEO-FFI) |                                         |                      |
| 71. NEOFAC_A                            | NEO-FFI Agreeableness                   | Typical range: 19–44 |
| 72. NEOFAC_O                            | NEO-FFI Openness                        |                      |
| 73. NEOFAC_C                            | NEO-FFI Conscientiousness               |                      |
| 74. NEOFAC_N                            | NEO-FFI Neuroticism                     |                      |
| 75. NEOFAC_E                            | NEO-FFI Extroversion                    |                      |

For more details, please refer to HCP Q3 release manual ([http://humanconnectome.org/documentation/Q3/Q3\\_Release\\_Reference\\_Manual.pdf](http://humanconnectome.org/documentation/Q3/Q3_Release_Reference_Manual.pdf)).
